# Supplementary material for: Two Novel SNPs in RET Gene Are Associated with Cattle Body Measurement Traits
Source: PubMed Central journal article supplement (PMC6826558; doi:10.3390/ani9100836), 2019-10-21
Supplement: animals-09-00836-s001.pdf [file animals-09-00836-s001.pdf]

|                   |                          |                   |                    |
|-------------------|--------------------------|-------------------|--------------------|
| UUU 3.4 (Phe 4)   | UCU 11.9 (Ser 14)        | UAU 1.7 (Tyr 2)   | UGU 11.9 (Cys 14)  |
| UUC 5.1 (Phe 6)   | UCC 6.8 (Ser 8)          | UAC 3.4 (Tyr 4)   | UGC 11.1 (Cys 13)  |
| UUA 3.4 (Leu 4)   | UCA 0.9 (Ser 1)          | UAA 5.1 (Stop 6)  | UGA 20.4 (Stop 24) |
| UUG 1.7 (Leu 2)   | UCG 6.0 (Ser 7)          | UAG 3.4 (Stop 4)  | UGG 15.3 (Trp 18)  |
| CUU 31.5 (Leu 37) | CCU 45.1 (Pro 53)        | CAU 17.9 (His 21) | CGU 29.0 (Arg 34)  |
| CUC 30.7 (Leu 36) | <u>CCC 29.0 (Pro 34)</u> | CAC 23.0 (His 27) | CGC 20.4 (Arg 24)  |
| CUA 16.2 (Leu 19) | CCA 28.1 (Pro 33)        | CAA 35.8 (Gln 42) | CGA 24.7 (Arg 29)  |
| CUG 29.0 (Leu 34) | <u>CCG 30.7 (Pro 36)</u> | CAG 29.8 (Gln 35) | CGG 21.3 (Arg 25)  |
| AUU 3.4 (Ile 4)   | ACU 3.4 (Thr 4)          | AAU 0.9 (Asn 1)   | AGU 11.1 (Ser 13)  |
| AUC 2.6 (Ile 3)   | ACC 4.3 (Thr 5)          | AAC 4.3 (Asn 5)   | AGC 11.1 (Ser 13)  |
| AUA 1.7 (Ile 2)   | ACA 2.6 (Thr 3)          | AAA 8.5 (Lys 10)  | AGA 14.5 (Arg 17)  |
| AUG 1.7 (Met 2)   | ACG 3.4 (Thr 4)          | AAG 2.6 (Lys 3)   | AGG 7.7 (Arg 9)    |
| GUU 9.4 (Val 11)  | GCU 40.0 (Ala 47)        | GAU 22.1 (Asp 26) | GGU 22.1 (Gly 26)  |
| GUC 13.6 (Val 16) | GCC 31.5 (Ala 37)        | GAC 10.2 (Asp 12) | GGC 28.1 (Gly 33)  |
| GUA 11.9 (Val 14) | GCA 18.7 (Ala 22)        | GAA 24.7 (Glu 29) | GGA 56.2 (Gly 66)  |
| GUG 11.9 (Val 14) | GCG 19.6 (Ala 23)        | GAG 17.9 (Glu 21) | GGG 24.7 (Gly 29)  |

**Supplementary Figure S1** The distribution of genetic codons of bovine *RET* gene.

Note: The underlined bases represent synonymous mutations.

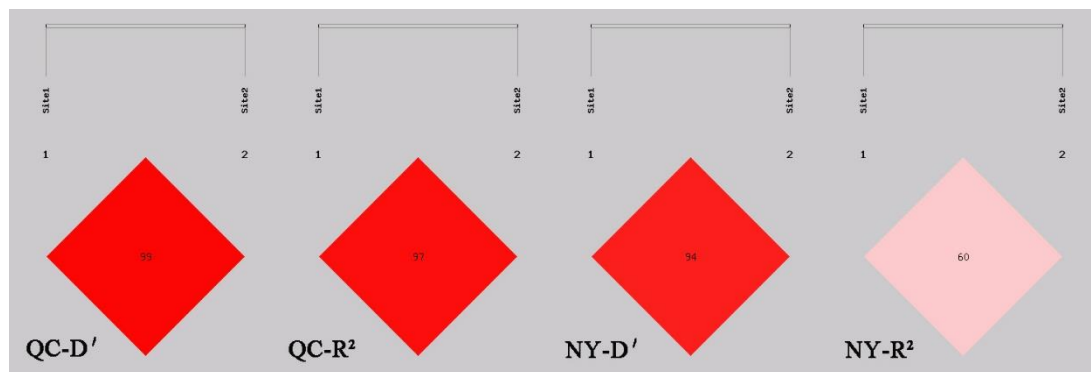

**Supplementary Figure S2** Linkage disequilibrium plot of two SNPs in bovine *RET* gene.

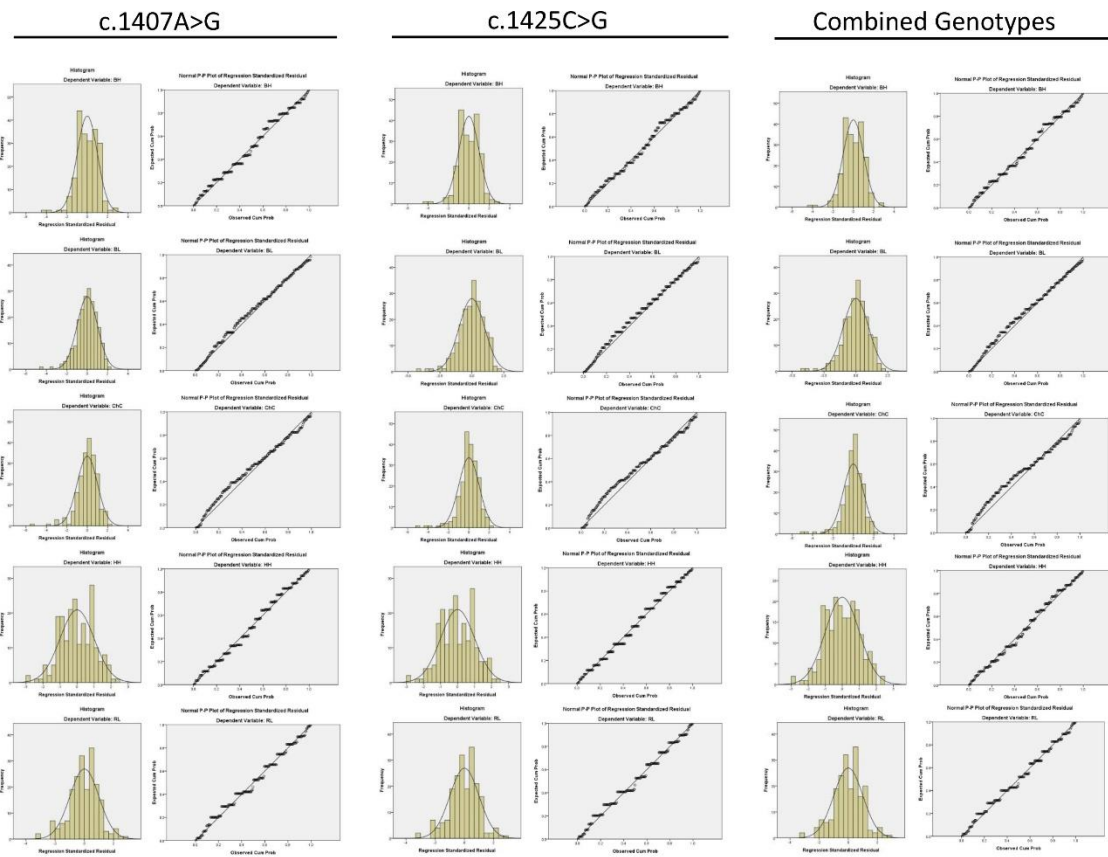

**Supplementary Figure S3** Graphical tests to explore normality of the residual in Qinchuan group. The left row of each SNP is the histogram and the right row is the normal P-P plot of regression standardized residual. Different line was shown the residual of the genotypes and different body measurement.

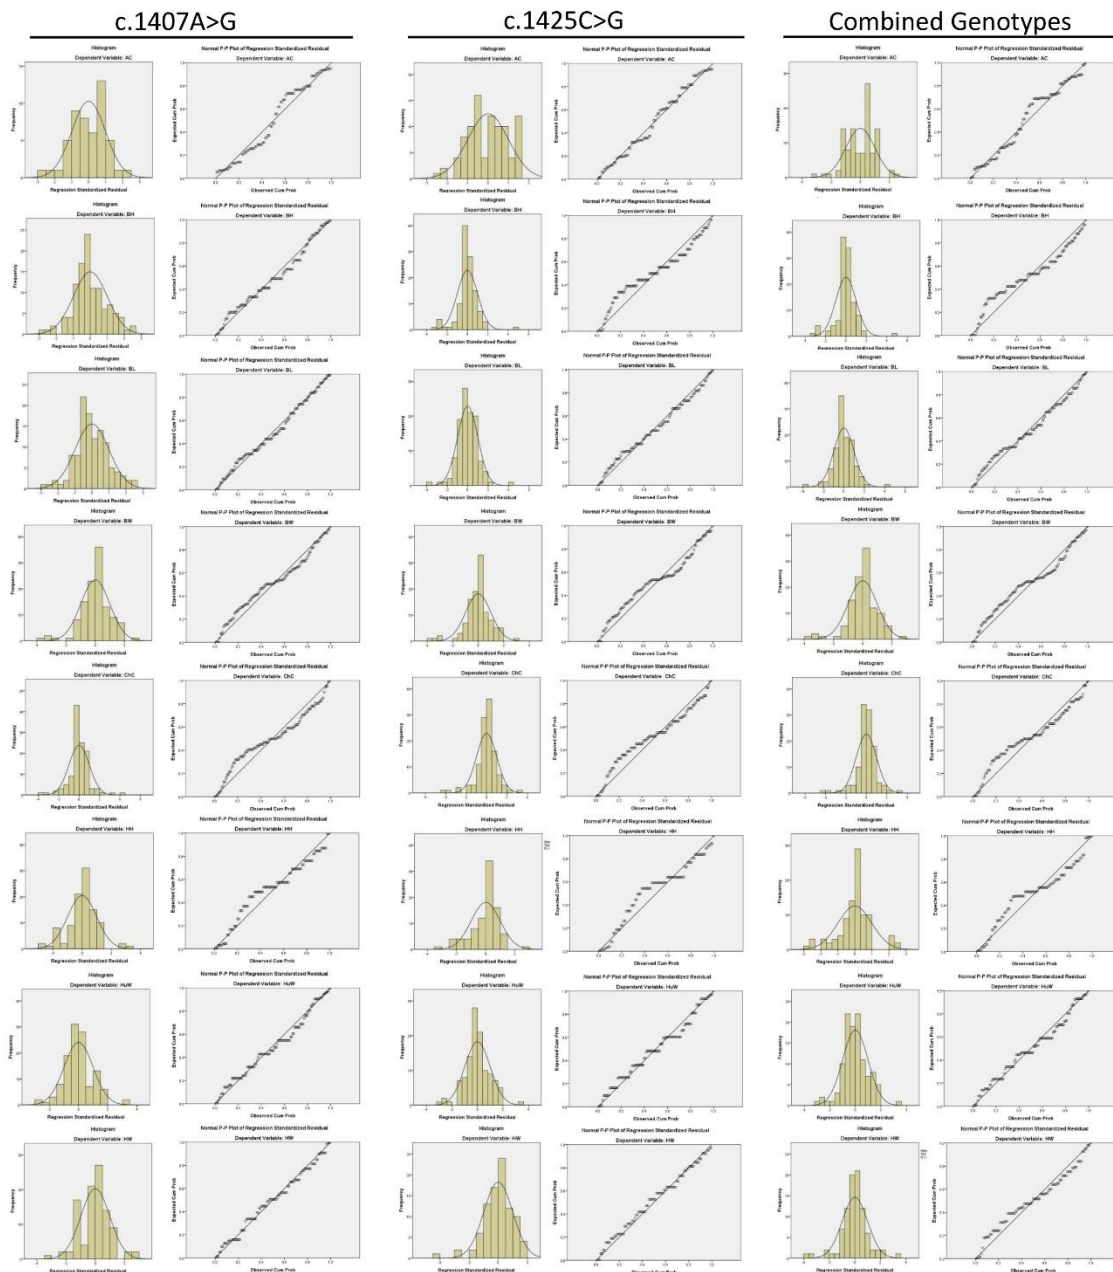

**Supplementary Figure S4** Graphical tests to explore normality of the residual in Nanyang group. The left row of each SNP is the histogram and the right row is the normal P-P plot of regression standardized residual. Different line was shown the residual of the genotypes and different body measurement.
